# Supplementary material for: An ionic charge-transfer dyad prepared cost-effectively from a tetrathiafulvalene carboxylate anion and a TMPyP cation
Source: Royal Society of Chemistry journal article supplement (doi:10.1039/c5cp06141e), 2015-12-18
Supplement: c5cp06141e1.pdf [file c5cp06141e1.pdf]

## An ionic charge-transfer dyad prepared cost-effectively from tetrathiafulvalene carboxylate anion and TMPyP cation

Li-Jun Xue, Peng Huo, Yan-Hong Li, Jin-Le Hou, Qin-Yu Zhu\* and Jie Dai\*

**Table S1.** Crystal Data and Structural Refinement Parameters for **1** and **2**.

**Table S2.** The energy of the frontier orbitals and the energy gaps of **2**.

**Chart S1** Structure of TTF(CONH<sub>2</sub>)<sub>2</sub>.

**Fig. S1** Frontier molecular orbitals of **2** calculated using DFT B3LYP/6-311G\*\* method.

**Fig. S2** UV-vis absorption of crystals **1** and **2** in DMF in different concentrations.

**Fig. S3** Partial <sup>1</sup>H NMR spectra of TMPyP and the mixture of TMPyP and 4eq. TTF(CONH<sub>2</sub>)<sub>2</sub> in *d*<sub>6</sub>-DMSO (the concentration of TMPyP is 4 × 10<sup>-3</sup> mol·L<sup>-1</sup>).

**Fig. S4** Comparison of the fluorescence spectra of **2** (λ<sub>ex</sub> = 488 nm) with that of TMPyP (λ<sub>ex</sub> = 470 nm), recorded at 1.0 × 10<sup>-3</sup> and 5.0 × 10<sup>-4</sup> mol·L<sup>-1</sup> concentrations in DMF at room temperature.

**Fig. S5** The relationship between the quenching degree of the fluorescence spectra at the peak of 652 nm and the concentration of **1** [Y-axis (quenching degree) = (fluorescence intensity of TMPyP – fluorescence intensity of **1**)/ fluorescence intensity of TMPyP].

**Fig. S6** Fluorescence spectra of TMPyP, **1**, and **2** in solid state at room temperature.

**Fig. S7** Changes of fluorescence spectra of TMPyP in DMF at room temperature, upon quantitative titration of TTF(CONH<sub>2</sub>)<sub>2</sub>.

**Fig. S8** Changes of fluorescence spectra of TMPyP (2.0 × 10<sup>-5</sup> mol·L<sup>-1</sup>) in DMF at room temperature, upon addition of increasing amounts of L<sup>1</sup> and L<sup>2</sup>.

**Table S1.** Crystal Data and Structural Refinement Parameters for **1** and **2**

|                                                              | <b>1</b>                                                                       | <b>2</b>                                                                      |
|--------------------------------------------------------------|--------------------------------------------------------------------------------|-------------------------------------------------------------------------------|
| formula                                                      | C <sub>84</sub> H <sub>72</sub> N <sub>8</sub> O <sub>19</sub> S <sub>24</sub> | C <sub>64</sub> H <sub>52</sub> N <sub>8</sub> O <sub>21</sub> S <sub>8</sub> |
| fw                                                           | 2267.07                                                                        | 1525.61                                                                       |
| cryst size (mm <sup>3</sup> )                                | 0.25 × 0.26 × 0.75                                                             | 0.05 × 0.12 × 0.20                                                            |
| cryst syst                                                   | monoclinic                                                                     | monoclinic                                                                    |
| space group                                                  | <i>P</i> 2 <sub>1</sub> / <i>m</i>                                             | <i>C</i> 2/ <i>c</i>                                                          |
| <i>a</i> (Å)                                                 | 10.8302(4)                                                                     | 23.6681(8)                                                                    |
| <i>b</i> (Å)                                                 | 33.4895(16)                                                                    | 22.0587(6)                                                                    |
| <i>c</i> (Å)                                                 | 13.8319(6)                                                                     | 13.2272(4)                                                                    |
| <i>α</i> (deg)                                               | 90.00                                                                          | 90.00                                                                         |
| <i>β</i> (deg)                                               | 99.191(4)                                                                      | 111.589(3)                                                                    |
| <i>γ</i> (deg)                                               | 90.00                                                                          | 90.00                                                                         |
| <i>V</i> (Å <sup>3</sup> )                                   | 4952.4(4)                                                                      | 6421.3(4)                                                                     |
| <i>Z</i>                                                     | 2                                                                              | 4                                                                             |
| $\rho_{\text{calcd}}$ (g cm <sup>-3</sup> )                  | 1.492                                                                          | 1.578                                                                         |
| <i>F</i> (000)                                               | 2300                                                                           | 3152                                                                          |
| $\mu$ (mm <sup>-1</sup> )                                    | 5.376                                                                          | 0.365                                                                         |
| <i>T</i> (K)                                                 | 293(2)                                                                         | 293(2)                                                                        |
| reflns collected                                             | 20829                                                                          | 19610                                                                         |
| unique reflns                                                | 9892                                                                           | 5651                                                                          |
| observed reflns                                              | 6181                                                                           | 4629                                                                          |
| no. params                                                   | 638                                                                            | 486                                                                           |
| GOF on <i>F</i> <sup>2</sup>                                 | 1.182                                                                          | 1.034                                                                         |
| <i>R</i> <sub>1</sub> [ <i>I</i> > 2 $\sigma$ ( <i>I</i> )]  | 0.0837                                                                         | 0.0401                                                                        |
| <i>wR</i> <sub>2</sub> [ <i>I</i> > 2 $\sigma$ ( <i>I</i> )] | 0.1767                                                                         | 0.1063                                                                        |

**Table S2.** The energy of the frontier orbitals and the energy gaps of **2**.

| orbital | energy (eV) | energy gap                                                     |
|---------|-------------|----------------------------------------------------------------|
| LUMO+1  | -3.132      | $E_{\text{LUMO+1}} - E_{\text{HOMO}} = 1.164$ eV (1065.2 nm)   |
| LUMO    | -3.259      | $E_{\text{LUMO+1}} - E_{\text{HOMO-1}} = 1.171$ eV (1058.8 nm) |
| HOMO    | -4.296      | $E_{\text{LUMO}} - E_{\text{HOMO}} = 1.001$ eV (1238.6 nm)     |
| HOMO-1  | -4.303      | $E_{\text{LUMO}} - E_{\text{HOMO-1}} = 1.044$ eV (1187.6 nm)   |

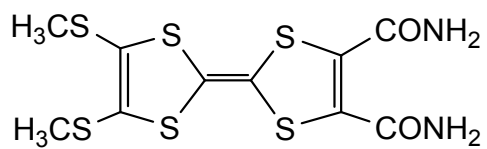

**Chart S1** Structure of TTF(CONH<sub>2</sub>)<sub>2</sub>.

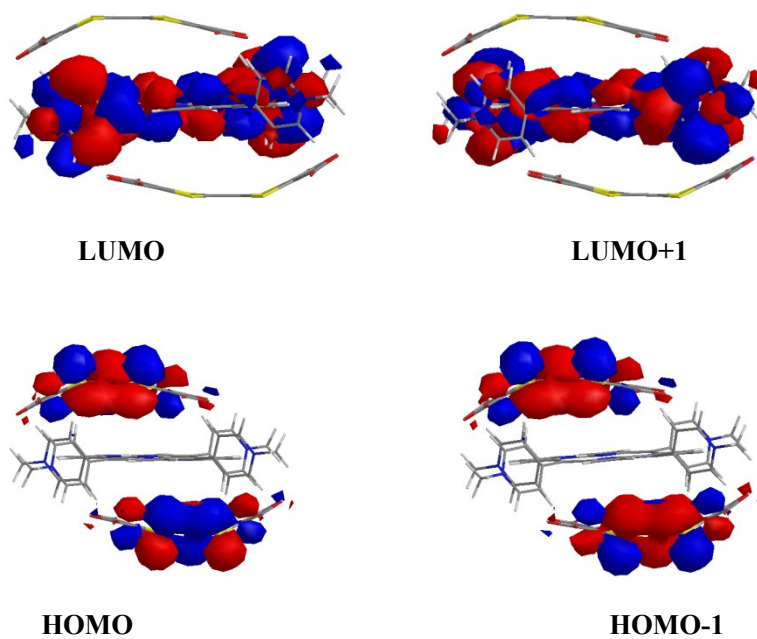

**Fig. S1** Frontier molecular orbitals of **2** calculated using DFT B3LYP/6-311G\*\* method.

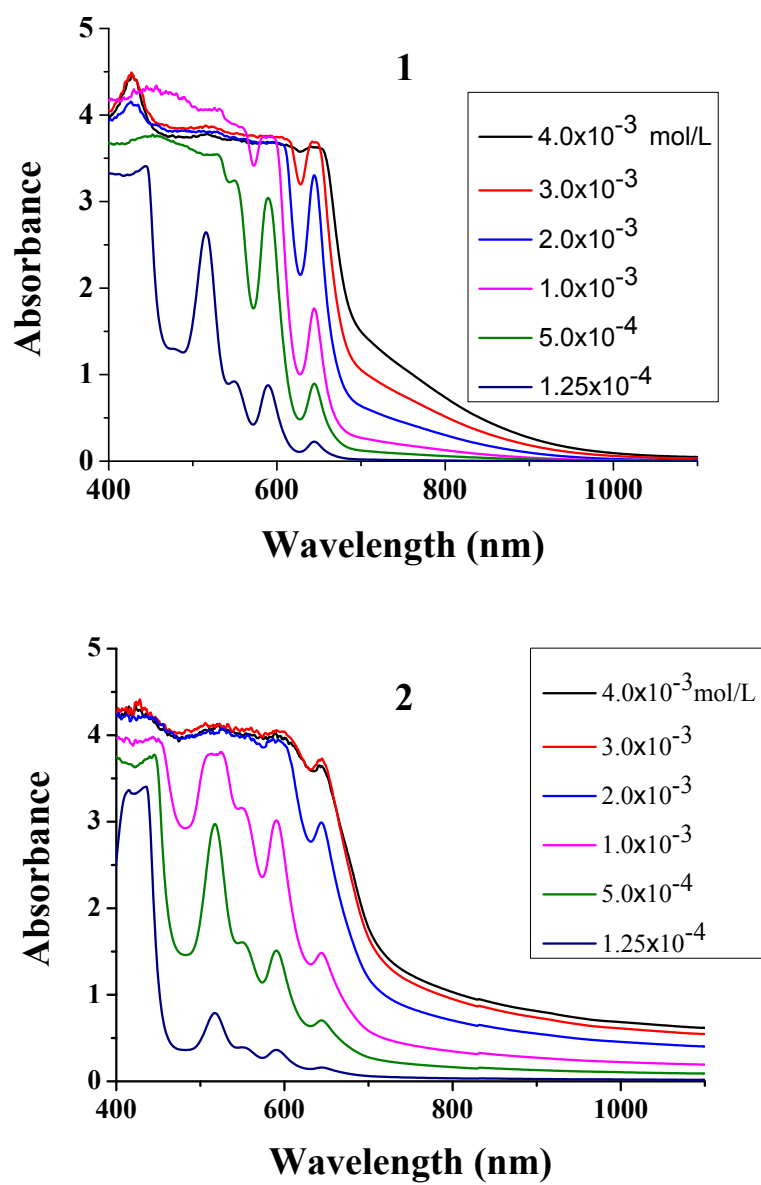

**Fig. S2** UV-vis absorption of crystals **1** and **2** in DMF in different concentrations.

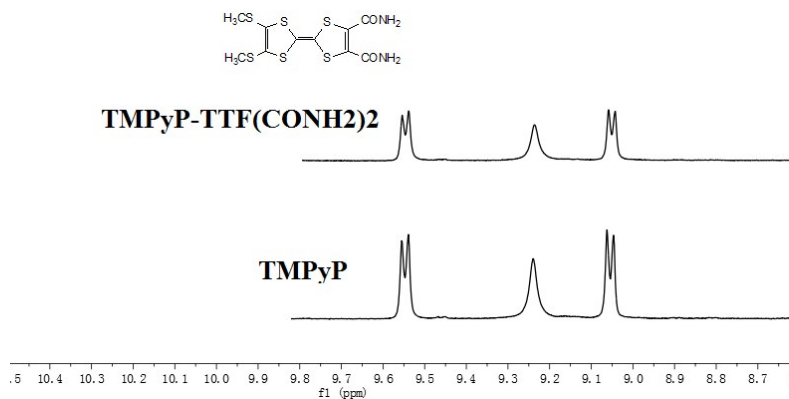

**Fig. S3** Partial  $^1\text{H}$  NMR spectra of TMPyP and the mixture of TMPyP and 4eq. TTF(CONH<sub>2</sub>)<sub>2</sub> in *d*<sub>6</sub>-DMSO (the concentration of TMPyP is  $4 \times 10^{-3}$  mol·L<sup>-1</sup>).

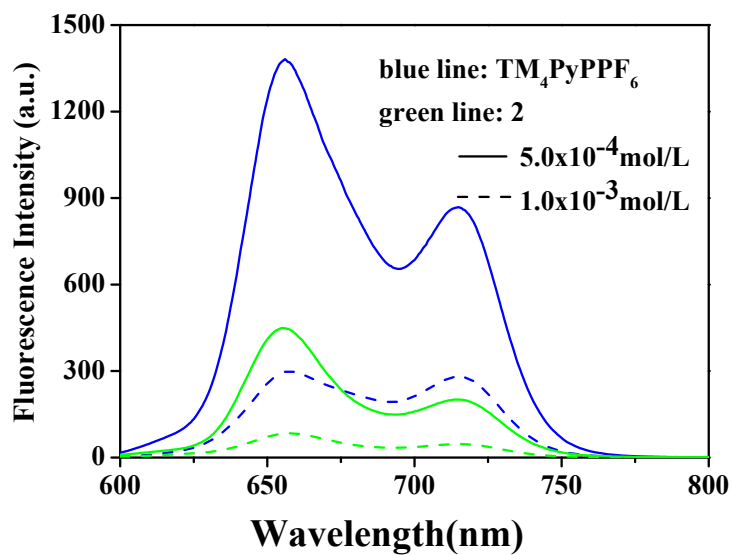

**Fig. S4** Comparison of the fluorescence spectra of **2** ( $\lambda_{\text{exc}} = 488$  nm) with that of **TMPyP** ( $\lambda_{\text{exc}} = 470$  nm), recorded at  $1.0 \times 10^{-3}$  and  $5.0 \times 10^{-4}$  mol·L<sup>-1</sup> concentrations in DMF at room temperature.

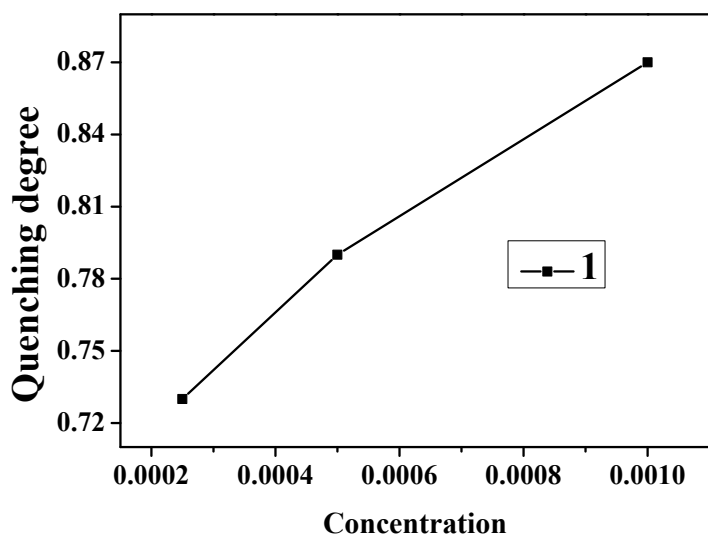

**Fig. S5** The relationship between the quenching degree of the fluorescence spectra at the peak of 652 nm and the concentration of **1** [Y-axis (quenching degree) = (fluorescence intensity of TMPyP – fluorescence intensity of **1**)/ fluorescence intensity of TMPyP].

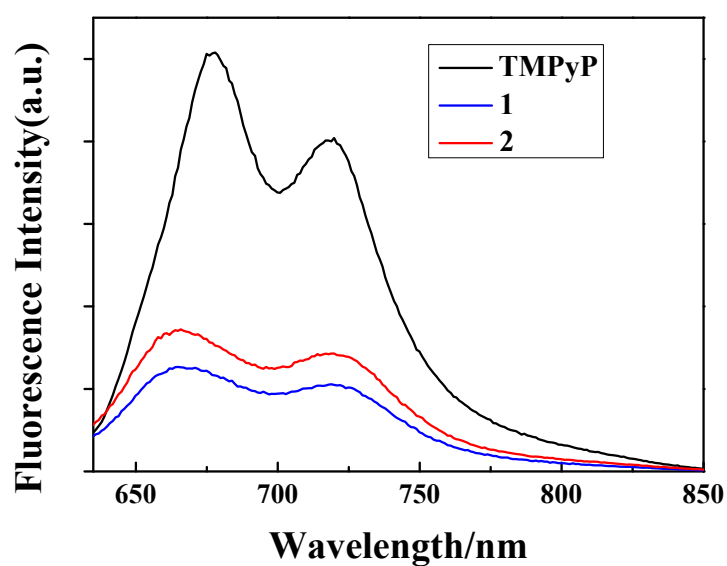

**Fig. S6** Fluorescence spectra of TMPyP, **1**, and **2** in solid state at room temperature.

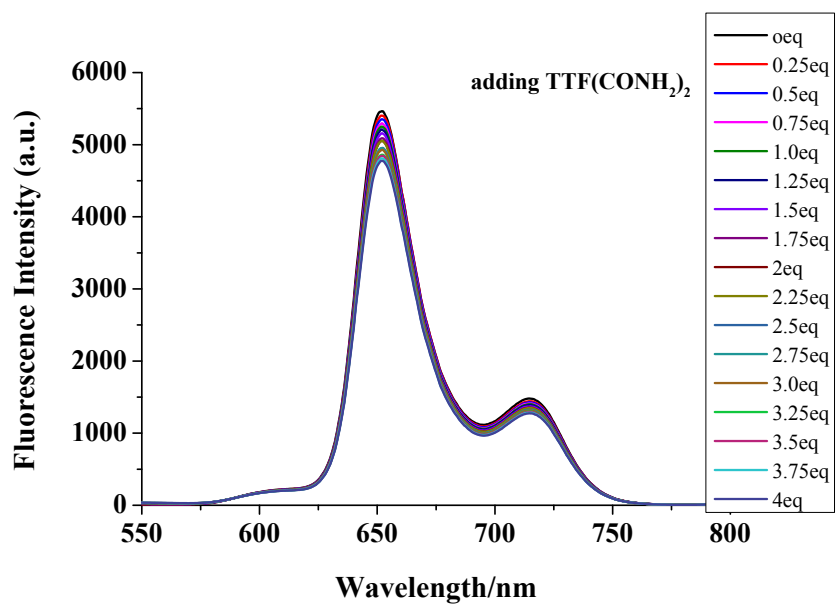

**Fig. S7** Changes of fluorescence spectra of TMPyP in DMF at room temperature, upon quantitative titration of TTF(CONH<sub>2</sub>)<sub>2</sub>.

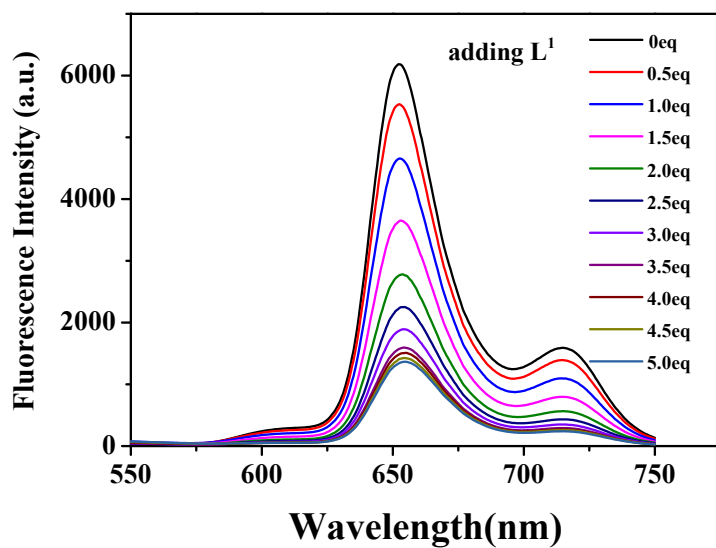

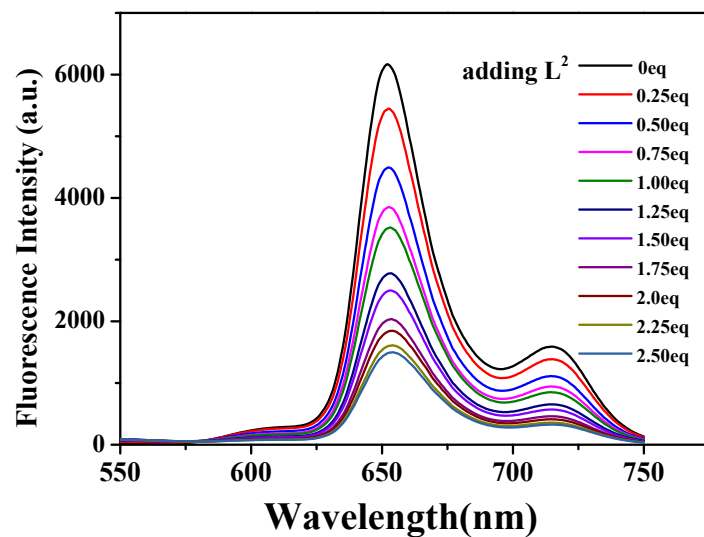

**Fig. S8** Changes of fluorescence spectra of TMPyP ( $2.0 \times 10^{-5} \text{ mol}\cdot\text{L}^{-1}$ ) in DMF at room temperature, upon quantitative titration of L<sup>1</sup> and L<sup>2</sup>.
